# Supplementary material
Source: publisher figshare collection journal article supplement (https://frontiersin.figshare.com/ndownloader/files/21622119)
Supplement: Supplementary file 1 [file 21622119]

TABLE S3 – Summary of GLM to test the variability in vulnerability level (low, moderate, high, very high) of catch biomass (vulnerability index ~ Level, family="quasipoisson”). Test performed for all the species, for the commercial fraction and for the non-commercial fraction. The “%” corresponds to the percentage of explained variance by the model.

Fraction Indices Algarve C. Sea L-NT Sicily S.

P(<Dev) % P(<Dev) % P(<Dev) % P(<Dev) %

All species Catchability *** 43.6 *** 54.9 *** 76 *** 74.7

Resistance *** 49.2 *** 55 *** 52.6 *** 68.1

Resilience *** 43.2 *** 51.3 *** 54.6 *** 58.8

Vulnerability *** 56.1 *** 57.2 *** 73.3 *** 66.4

Commercial Catchability *** 52.3 *** 56.4 *** 67.3 *** 72.6

Resistance ns - *** 56.6 *** 45.7 *** 65.5

Resilience *** 20.3 *** 51.3 *** 42.2 *** 54.3

Vulnerability *** 41.3 *** 57.1 *** 69.8 *** 62.4

Non-commercial Catchability *** 43.8 *** 16.5 *** 67.3 *** 39.5

Resistance *** 48.1 * 13.8 *** 51.1 *** 42

Resilience *** 48.9 * 34.7 *** 58.5 *** 43.4

Vulnerability *** 54.5 *** 35.4 *** 64.6 *** 70.2

ns: non-significant; * p<0.05; **p<0.01; ***p<0.001
